# Supplementary material for: Results and Guidelines From a Repeated-Measures Design Experiment Comparing Standing and Seated Full-Body Gesture-Based Immersive Virtual Reality Exergames: Within-Subjects Evaluation
Source: PubMed Central journal article supplement (PMC7418021; doi:10.2196/17972), 2020-07-27
Supplement: games_v8i3e17972_app2.pdf [file games_v8i3e17972_app2.pdf]

### A: IMI Questionnaire

|            |   |   |          |   |   |      |
|------------|---|---|----------|---|---|------|
| 1          | 2 | 3 | 4        | 5 | 6 | 7    |
| not at all |   |   | somewhat |   |   | Very |

#### Interest/Enjoyment

1. I enjoyed doing this activity very much
2. This activity was fun to do.
3. I thought this was a boring activity. (Reverse score)
4. This activity did not hold my attention at all. (Reverse score)
5. I would describe this activity as very interesting.
6. I thought this activity was quite enjoyable.
7. While I was doing this activity, I was thinking about how much I enjoyed it.

#### Perceived Competence

1. I think I am pretty good at this activity.
2. I think I did pretty well at this activity, compared to other students.
3. After working at this activity for awhile, I felt pretty competent.
4. I am satisfied with my performance at this task.
5. I was pretty skilled at this activity.
6. This was an activity that I couldn't do very well. (Reverse score)

#### Pressure/Tension

1. I did not feel nervous at all while doing this. (Reverse score)
2. I felt very tense while doing this activity.
3. I was very relaxed in doing these. (Reverse score)
4. I was anxious while working on this task.
5. I felt pressured while doing these.

#### Value/Usefulness

1. I believe this activity could be of some value to me.
2. I think that doing this activity is useful for health
3. I think this is important to do because it can improve my health
4. I would be willing to do this again because it has some value to me.
5. I think doing this activity could help me to build up my body
6. I believe doing this activity could be beneficial to me.
7. I think this is an important activity.

### B: Motion Sickness Assessment Questionnaire

|            |   |   |   |   |   |   |   |          |
|------------|---|---|---|---|---|---|---|----------|
| 1          | 2 | 3 | 4 | 5 | 6 | 7 | 8 | 9        |
| Not at all |   |   |   |   |   |   |   | Severely |

#### Questions:

1. I felt sick to my stomach
2. I felt faint-like
3. I felt annoyed/irritated
4. I felt sweaty
5. I felt queasy
6. I felt lightheaded
7. I felt drowsy
8. I felt clammy/cold sweat
9. I felt disoriented
10. I felt tired/fatigued
11. I felt nauseated

- 12. I felt hot/warm
- 13. I felt dizzy
- 14. I felt like I was spinning
- 15. I felt as if I may vomit
- 16. I felt uneasy

**C: BORG 6-20 Rate of Perceived Exertion Scale (RPE)**

Select one rating from the below table:

| Perceived Exertion | Rating | Description                                                             |
|--------------------|--------|-------------------------------------------------------------------------|
| No Exertion        | 6      | Little to no movement, very relaxed                                     |
| Extremely Light    | 7      | Able to maintain pace                                                   |
|                    | 8      |                                                                         |
| Very Light         | 9      | Comfortable and breathing harder                                        |
|                    | 10     |                                                                         |
| Light              | 11     | Minimal sweating, can talk easily                                       |
|                    | 12     |                                                                         |
| Somewhat Hard      | 13     | Slight breathlessness, can talk                                         |
|                    | 14     |                                                                         |
| Hard               | 15     | Increased sweating, still able to hold conversation but with difficulty |
|                    | 16     |                                                                         |
| Very Hard          | 17     | Sweating, able to push and still maintain proper form                   |
|                    | 18     |                                                                         |
| Extremely Hard     | 19     | Can keep a fast pace for a short time period                            |
|                    | 20     |                                                                         |
| Maximally Hard     | 20     | Difficulty breathing, near muscle exhaustion                            |
|                    |        | STOP exercising, total exhaustion                                       |

**D: Fear of falling**

How concerned you are about the possibility of falling during the experiment?

|            |   |   |   |   |   |   |   |   |           |
|------------|---|---|---|---|---|---|---|---|-----------|
| 1          | 2 | 3 | 4 | 5 | 6 | 7 | 8 | 9 | 10        |
| Not at all |   |   |   |   |   |   |   |   | Extremely |

**E: Comments:**

What do you think about this version of the game?
